# Supplementary material
Source: PubMed Central journal article supplement (PMC2898611)

## Supplementary Materials for

### Identification and validation of genes affecting aortic lesions in mice

Xia Yang<sup>1,2\*</sup>, Larry Peterson<sup>3</sup>, Rolf Thieringer<sup>4</sup>, Joshua L. Deignan<sup>5</sup>, Xuping Wang<sup>6</sup>, Jun Zhu<sup>1,2</sup>, Susanna Wang<sup>6</sup>, Hua Zhong<sup>1,2</sup>, Serguei Stepaniants<sup>1,7</sup>, John Beaulaurier<sup>1</sup>, I-Ming Wang<sup>1</sup>, Ray Rosa<sup>3</sup>, Anne-Marie Cumiskey<sup>3</sup>, Jane Ming-Juan Luo<sup>8</sup>, Qi Luo<sup>8</sup>, Kashmira Shah<sup>8</sup>, Jianying Xiao<sup>8</sup>, David Nickle<sup>1</sup>, Andrew Plump<sup>8</sup>, Eric E. Schadt<sup>1,9</sup>, Aldons J. Lusis<sup>6</sup>, Pek Yee Lum<sup>1,7\*</sup>

<sup>1</sup>Department of Molecular Profiling, Rosetta Inpharmatics LLC, a wholly owned subsidiary of Merck & Co, Inc. Seattle, WA, USA; <sup>2</sup>Sage Bionetworks, Seattle, WA, USA; <sup>3</sup>Department of Pharmacology, Merck & Co, Inc. Rahway, NJ, USA; <sup>4</sup>Department of External Scientific Affairs, Merck & Co, Inc. Rahway, NJ, USA; <sup>5</sup>Department of Pathology and Laboratory Medicine, University of California, Los Angeles, CA, USA; <sup>6</sup>Departments of Human Genetics; Medicine; and Microbiology, Molecular Genetics and Immunology, University of California, Los Angeles, CA, USA; <sup>7</sup>iPierian Inc., San Francisco, CA, USA; <sup>8</sup>Department of Cardiovascular Disease, Merck & Co, Inc. Rahway, NJ, USA; <sup>9</sup>Pacific Biosciences, San Francisco, CA, USA.

\*Co-corresponding authors:

Pek Yee Lum, Ph.D.

Xia Yang, Ph.D.

Rosetta Inpharmatics LLC.,

A wholly owned subsidiary of Merck & Co., Inc.

401 Terry Ave N

Seattle, WA 98109

Emails: [pek.lum@ipierian.com](mailto:pek.lum@ipierian.com)

[xia.yang@sagebase.org](mailto:xia.yang@sagebase.org)

Phone: 206-667-2118

Fax: 206-667-2062

## Supplementary Materials

### Supplementary Tables

Supplementary Table 1-10 are supplied as a separate excel workbook.

### Supplementary Figure Legends

Supplementary Figure 1. Comparison between the aortic lesion causal genes and plaque progression signatures. The distribution of the plaque progression signature genes (red dots) among the aortic lesion causal genes (black dots) from BxH *ApoE*<sup>-/-</sup> F2 mice is plotted with the causality strength of each gene (causal trait  $r^2$ ) on the X-axis and the trait-gene correlation strength (TGC  $r^2$ ) on the Y-axis. Upper panel shows the overlap of aortic lesion causal genes from adipose tissue of the F2 cross with plaque progression signature from *ApoE*<sup>-/-</sup> (left), *Ldlr*<sup>-/-</sup> huCETP tg (middle), and both (right) mouse models. Lower panel shows the overlap of aortic lesion causal genes from liver tissue of the F2 cross with plaque progression signature from *ApoE*<sup>-/-</sup> (left), *Ldlr*<sup>-/-</sup> huCETP tg (middle), and both (right) mouse models.

## Supplementary Figures

Supplementary Figure 1. Comparison between the aortic lesion causal genes and plaque progression signatures.

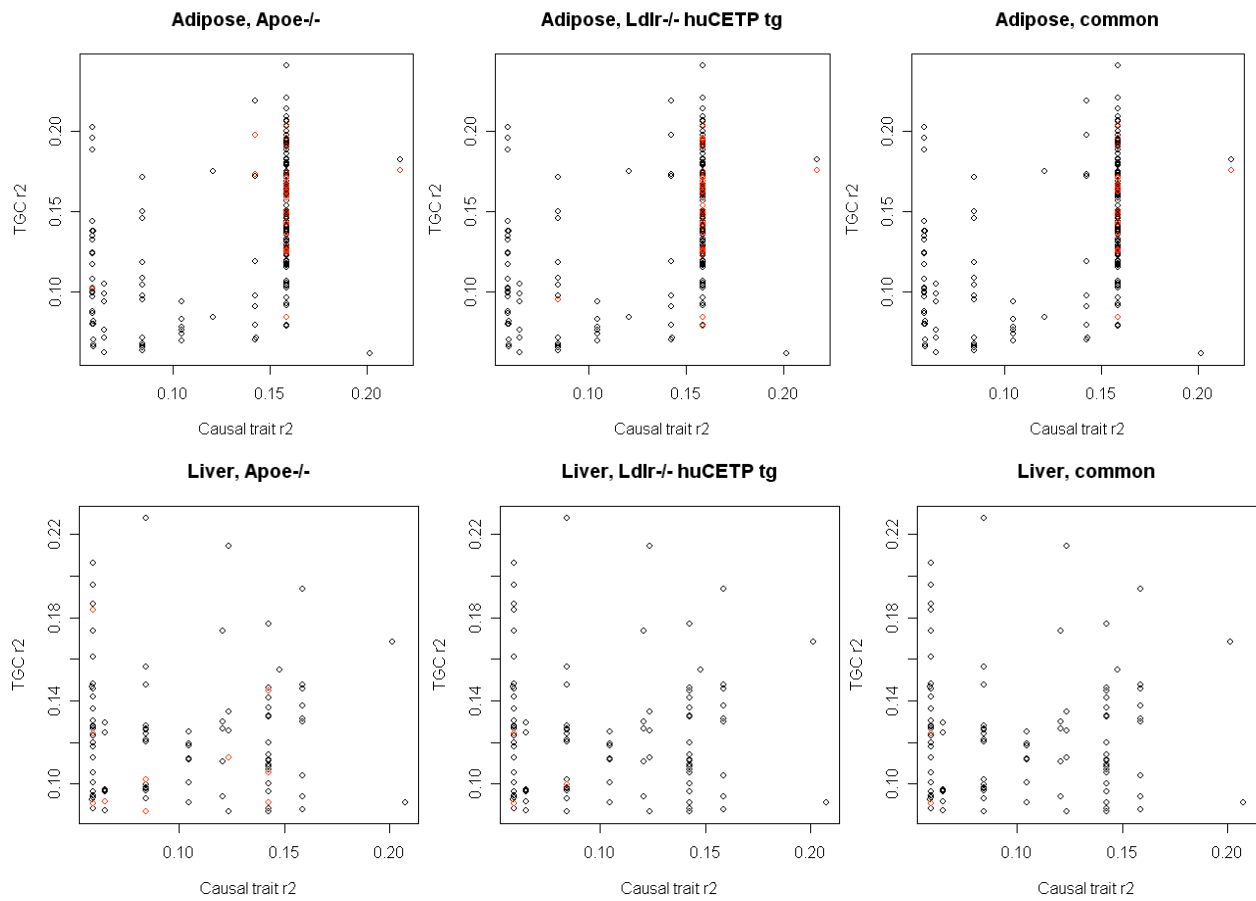

Supplement: JCI42742sd.pdf [file JCI42742sd.pdf]
